# Supplementary material
Source: PubMed Central journal article supplement (PMC3665604)
Supplement: NIHMS457196-supplement-1_si_001.pdf [file NIHMS457196-supplement-1_si_001.pdf]

# Uncovering the Mechanism of the Silver(I)/Persulfate-Catalyzed Cross-Coupling of Arylboronic Acids with Heteroarenes

Niki R. Patel and Robert A. Flowers, II\*  
Department of Chemistry, Lehigh University, Bethlehem, Pennsylvania 18015  
Email: [rof2@lehigh.edu](mailto:rof2@lehigh.edu)

## Supporting Information

|                                                                         |     |
|-------------------------------------------------------------------------|-----|
| Instrumentation                                                         | S4  |
| Materials for synthetic and kinetic studies                             | S4  |
| Procedure for degassing solvents                                        | S4  |
| Procedure for synthesis of <b>3</b>                                     | S4  |
| Procedure for Reaction Progress Kinetic Analysis Studies                | S5  |
| Procedure for pyridine <sup>1</sup> H NMR studies                       | S5  |
| Procedure for <sup>11</sup> B NMR studies                               | S5  |
| Spectroscopic data for <b>3</b>                                         | S6  |
| Conditions for same excess experiments (Run 1 and 2)                    | S6  |
| Decay data for Run 1                                                    | S6  |
| Growth data for Run 1                                                   | S7  |
| Decay data for Run 2                                                    | S7  |
| Plot of rate vs. [1] for catalyst stability                             | S8  |
| Conditions for different excess experiments for rate order for <b>2</b> | S8  |
| Decay plot for Run 3                                                    | S8  |
| Plot of rate vs. [1] for rate order for <b>2</b> – Run 3                | S9  |
| Plot of normalized rate vs. [1] for rate order for <b>2</b> – Run 3     | S9  |
| Conditions for different excess experiments for rate order for <b>1</b> | S10 |
| Growth plot for Run 4                                                   | S10 |

|                                                                                                              |            |
|--------------------------------------------------------------------------------------------------------------|------------|
| Plot of rate vs. [3] for rate order of 1                                                                     | <b>S10</b> |
| Conditions for different excess experiments for rate order for AgNO <sub>3</sub>                             | <b>S11</b> |
| Decay plot for Run 5                                                                                         | <b>S11</b> |
| Plot of rate vs. [1] for rate order for AgNO <sub>3</sub>                                                    | <b>S11</b> |
| Plot of normalized rate vs. [1] for rate order for AgNO <sub>3</sub>                                         | <b>S12</b> |
| Conditions for different excess experiments for rate order for K <sub>2</sub> S <sub>2</sub> O <sub>8</sub>  | <b>S12</b> |
| Decay plot for Run 6                                                                                         | <b>S12</b> |
| Plot of rate vs. [1] for rate order for K <sub>2</sub> S <sub>2</sub> O <sub>8</sub>                         | <b>S13</b> |
| Conditions for different excess experiments for rate order for TFA                                           | <b>S13</b> |
| Decay plot for Run 7                                                                                         | <b>S13</b> |
| Plot of rate vs. [1] for rate order for TFA                                                                  | <b>S14</b> |
| Conditions for different excess experiments for rate order for Na <sub>2</sub> S <sub>2</sub> O <sub>8</sub> | <b>S14</b> |
| Decay plot for Run 8                                                                                         | <b>S14</b> |
| Decay plot for Run 9                                                                                         | <b>S15</b> |
| Plot of rate vs. [1] for rate order for Na <sub>2</sub> S <sub>2</sub> O <sub>8</sub>                        | <b>S15</b> |
| Conditions for experiments using allyl acetate as sulfate radical anion trap                                 | <b>S16</b> |
| Decay plot for Run 10                                                                                        | <b>S16</b> |
| Plot of rate vs. [1] comparing Run 1 (100% run) to Run 10 (100% run with Allyl Acetate)                      | <b>S16</b> |
| Calculation of conversion of rate data and error                                                             | <b>S17</b> |
| Reactions of boronic acid with silver nitrate                                                                | <b>S17</b> |
| Derivation of rate law                                                                                       | <b>S18</b> |
| Spectral data for pyridine <sup>1</sup> H NMR studies                                                        | <b>S19</b> |
| <sup>11</sup> B NMR spectrum of 2                                                                            | <b>S20</b> |

|                                                                                         |            |
|-----------------------------------------------------------------------------------------|------------|
| $^{11}\text{B}$ NMR spectrum of <b>4</b> under reaction conditions at $t = 0\text{min}$ | <b>S21</b> |
| $^{11}\text{B}$ NMR spectrum of <b>4</b> under reaction conditions at $t = 4\text{h}$   | <b>S22</b> |
| $^1\text{H}$ and $^{13}\text{C}$ NMR spectra for cross-coupled product <b>3</b>         | <b>S23</b> |

## **Instrumentation**

GC analyzes were done using a Shimadzu Gas Chromatograph GC-14B. Proton, carbon, and boron NMR were recorded on a Bruker 500 MHz spectrometer. GC-MS analyses were done with an HP 5890 Series II Gas Chromatograph with an HP Mass Selector Detector. Column chromatography was performed using the automated CombiFlash® Rf system from Teledyne Isco, Inc. Products were separated using prepacked silica gel columns with a gradient elution of ethyl acetate and hexanes.

## **Materials for synthetic and kinetic studies**

$\text{AgNO}_3$ ,  $\text{K}_2\text{S}_2\text{O}_8$ ,  $\text{Na}_2\text{S}_2\text{O}_8$  were purchased from Acros Organics. **1** was purchased from Oakwood Products, Inc. **2** was purchased from TCI Fine Chemicals. TFA and **4** was purchased from Alfa Aesar. All chemicals were used without further purification.

## **Procedure for degassing solvents**

$\text{CH}_2\text{Cl}_2$  was purified by a Solvent Purification system (Innovative Technology Inc.; MA).  $\text{H}_2\text{O}$  was degassed by bubbling through with argon overnight.

## **Procedure for synthesis of 3**

In a 25 mL round bottom flask with a magnetic stirring bar, **1**, TFA, and **2** were dissolved in 10 mL  $\text{CH}_2\text{Cl}_2$ . To the flask, 5 mL degassed  $\text{H}_2\text{O}$  was added.  $\text{AgNO}_3$  was dissolved in 5 mL degassed water and added to the reaction.  $\text{K}_2\text{S}_2\text{O}_8$  was added to the reaction as a solid. The flask was then evacuated of air, a septum was attached, and was back-filled with Ar. The reaction was allowed to stir overnight. Reaction workup involved diluting the reaction with 10 mL  $\text{CH}_2\text{Cl}_2$  and quenching with 10 mL saturated bicarbonate solution. The organic layer was separated and run through a plug of neutral alumina. The alumina was washed with ethyl acetate. Product formation was confirmed by GC-MS. The organic layer was rotary evaporated to dryness. Crude

product formation was observed by  $^1\text{H}$  NMR in  $\text{CDCl}_3$ . Product was purified via automated flash chromatography and characterized by  $^1\text{H}$  NMR and  $^{13}\text{C}$  NMR.

### Procedure for Reaction Progress Kinetic Analysis<sup>1</sup> Studies

In a 100 mL round bottom flask with a magnetic stirring bar, **1**, TFA, and **2** were dissolved in 30 mL  $\text{CH}_2\text{Cl}_2$ . To the flask, 15 mL degassed  $\text{H}_2\text{O}$  was added.  $\text{AgNO}_3$  was dissolved in 15 mL degassed water and added to the reaction.  $\text{K}_2\text{S}_2\text{O}_8$  was added to the reaction as a solid. The flask was then evacuated of air, a septum was attached, and was back-filled with Ar. The reaction was stopped and 0.5 mL aliquots were taken from the organic layer during the course of the reaction. Aliquots taken were quenched with 1.0 mL saturated bicarbonate solution, and 0.5 mL of biphenyl in ethyl acetate solution was added as an internal standard. The organic layer was extracted and analyzed by GC.

### Procedure for pyridine $^1\text{H}$ NMR studies

$^1\text{H}$  NMR spectra were obtained for four solutions: 1) In a vial, 28.75  $\mu\text{L}$  (0.25 mmol) of **1** was dissolved in 1.0 mL  $\text{CDCl}_3$ . 2) In a vial, 28.75  $\mu\text{L}$  (0.25 mmol) of **1** and 18.575  $\mu\text{L}$  (0.25 mmol) of TFA was dissolved in 1.0 mL  $\text{CDCl}_3$ . 3) In a vial, 28.75  $\mu\text{L}$  (0.25 mmol) of **1**, 18.575  $\mu\text{L}$  (0.25 mmol) of TFA, and 42.475 mg (0.25 mmol) of  $\text{AgNO}_3$  were dissolved in 1.0 mL  $\text{CDCl}_3$ . 4) In a vial, 28.75  $\mu\text{L}$  (0.25 mmol) of **1** and 42.475 mg (0.25 mmol) of  $\text{AgNO}_3$  were dissolved in 1.0 mL  $\text{CDCl}_3$ .

### Procedure for $^{11}\text{B}$ NMR studies

$^{11}\text{B}$  NMR studies were done using quartz NMR tubes. Spectra were obtained for the following solutions: 1) **2** dissolved in  $\text{D}_2\text{O}$ . 2) In a vial, 0.15 mmol of **4**, 0.1 mmol of **1**, 0.1 mmol of TFA, and 0.02 mmol of  $\text{AgNO}_3$  was dissolved in 1 mL  $\text{D}_2\text{O}$ . The solution was then transferred

---

<sup>1</sup> (a) Mathew, J S.; Klussman, M.; Iwamura, H.; Valera, F.; Futran, A.; Emanuelsson, E. A. C.; Blackmond, D. G. *J. Org. Chem.* 2006, 71, 4711-4722. (b) Blackmond, D. G. *Angew. Chem. Int. Ed.* 2005, 44, 4302-4320. (c) Devery, J. J., III.; Conrad, J. C.; MacMillan, D. W. C.; Flowers, R. A., II. *Angew. Chem. Int. Ed.* 2010, 49, 6106-6110. (d) Choquette, K. A.; Sadasivam, D. V.; Flowers, R. A., II. *J. Am. Chem. Soc.* 2011, 133, 10655-10661. (reference 7 in paper)

to a quartz NMR tube. A  $^{11}\text{B}$  NMR spectrum was immediately obtained. After letting the previous sample sit for 4h, a  $^{11}\text{B}$  NMR spectrum was obtained again, showing some hydrolysis of **4** to **2**. 3) In a vial, 0.15 mmol of **4**, 0.1 mmol of TFA, and 0.02mmol of  $\text{AgNO}_3$  was dissolved in 1mL  $\text{D}_2\text{O}$ . The solution was then transferred to a quartz NMR tube. A  $^{11}\text{B}$  NMR spectrum was immediately obtained. After letting the previous sample sit for 4h, a  $^{11}\text{B}$  NMR spectrum was obtained again, showing some hydrolysis of **4** to **2**.

### Spectroscopic data for **3**

$^1\text{H}$  NMR (500 MHz,  $\text{CDCl}_3$ )  $\delta$  (ppm): 8.85 (1H, d), 7.93 (3H), 7.42 (1H, d), 7.32 (2H, d), 2.43 (3H, s);  $^{13}\text{C}$  NMR (125 MHz,  $\text{CDCl}_3$ )  $\delta$  (ppm): 158.85, 150.54, 140.04, 139.08, 135.32, 129.69, 126.92, 121.95, 117.13, 115.63, 21.31; GC/MS  $m/z$  (rel. abundance) 237 (100), 91 (13).

### Conditions for same excess experiments (Run 1 and 2)

| Run    | [1] (M) | [2] (M) | [e] (M) | $\text{K}_2\text{S}_2\text{O}_8$ (M) | [e] (M) | $\text{AgNO}_3$ (M) |
|--------|---------|---------|---------|--------------------------------------|---------|---------------------|
| 1-100% | 0.1     | 0.15    | 0.05    | 0.3                                  | 0.2     | 0.02                |
| 2-50%  | 0.05    | 0.1     | 0.05    | 0.25                                 | 0.2     | 0.02                |

### Decay data for Run 1

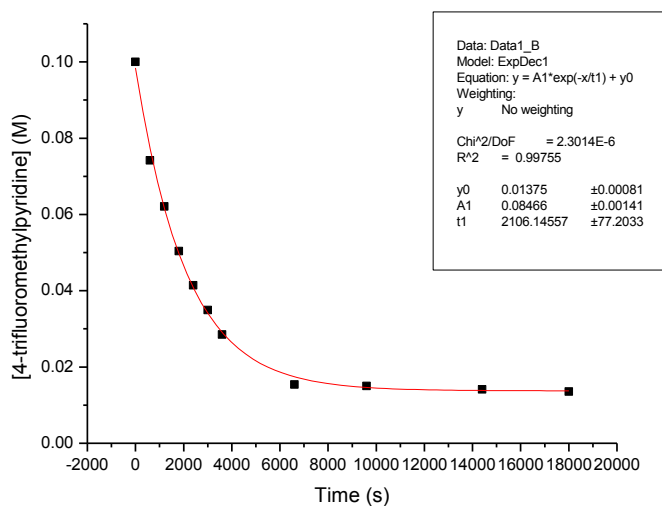

## Growth data for Run 1

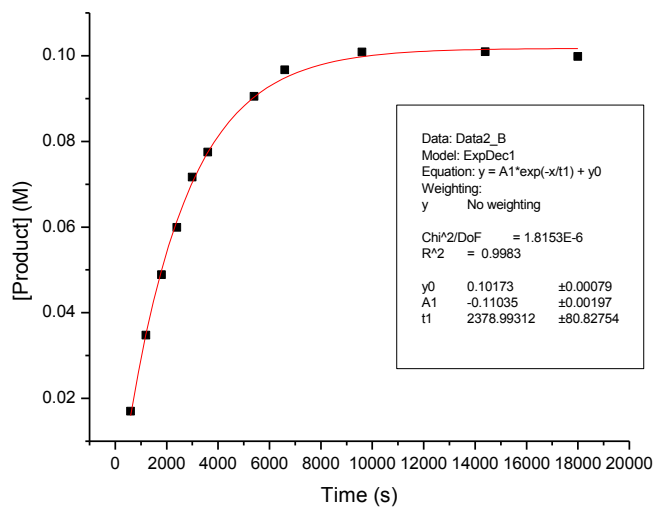

## Decay data for Run 2

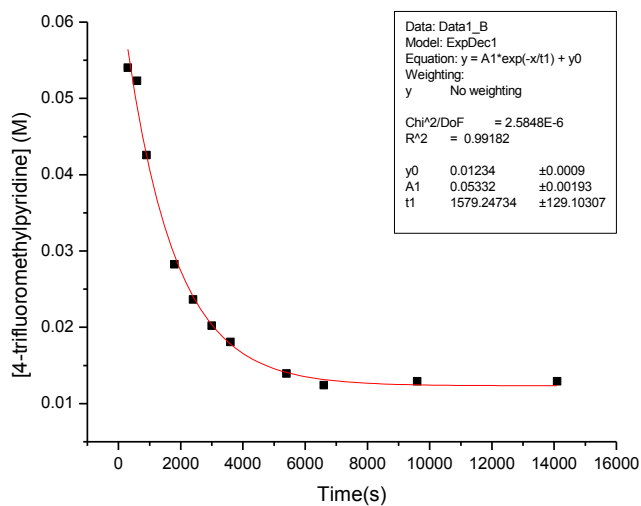

### Plot of rate vs. [1] for catalyst stability

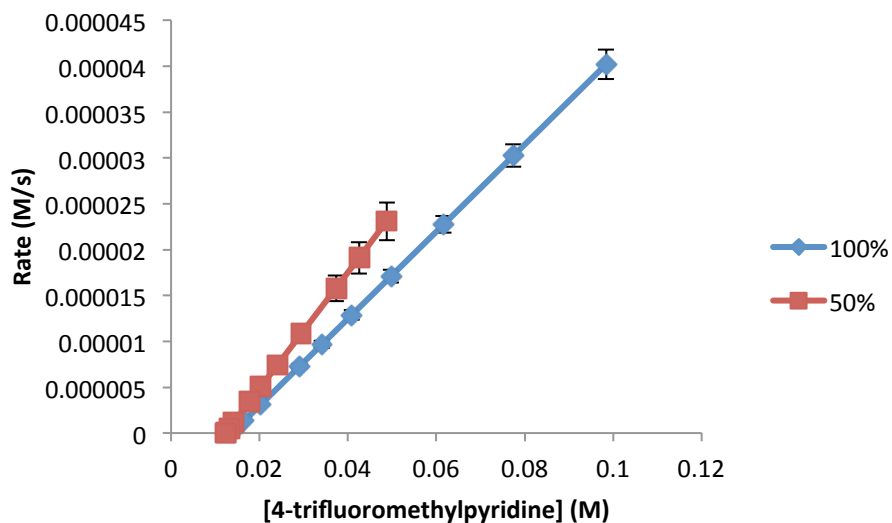

### Conditions for different excess experiments for rate order for 2

| Run       | [1] (M) | [2] (M) | [e] (M) | K <sub>2</sub> S <sub>2</sub> O <sub>8</sub> (M) | AgNO <sub>3</sub> (M) |
|-----------|---------|---------|---------|--------------------------------------------------|-----------------------|
| 2-50%     | 0.05    | 0.1     | 0.05    | 0.25                                             | 0.02                  |
| 3-Diff xs | 0.05    | 0.3     | 0.25    | 0.25                                             | 0.02                  |

### Decay data for Run 3

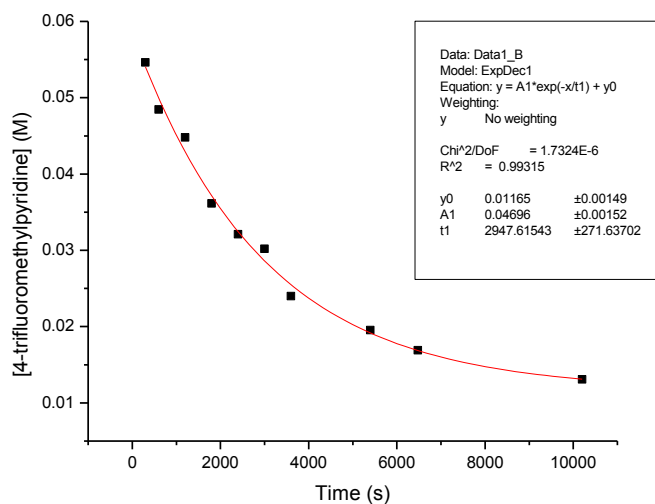



Plot of rate vs. [1] for rate order for 2 – Run 3

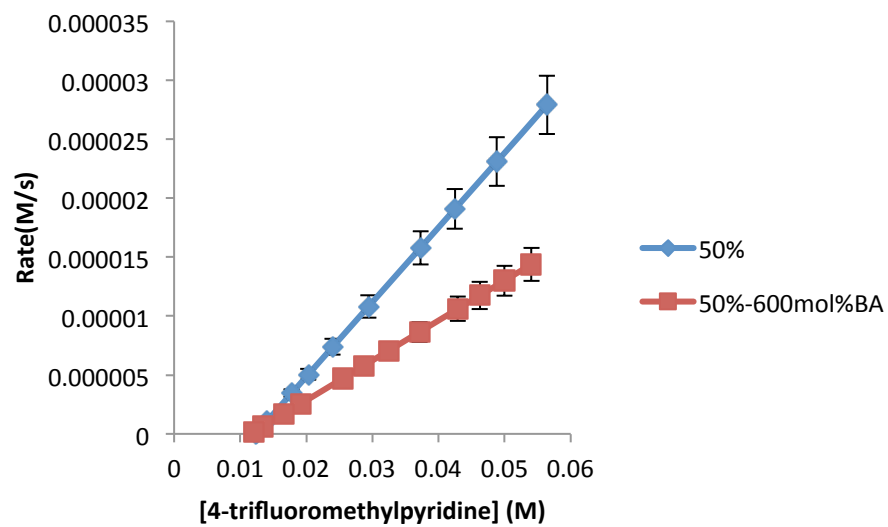

Plot of normalized rate vs. [1] for rate order for 2 – Run 3

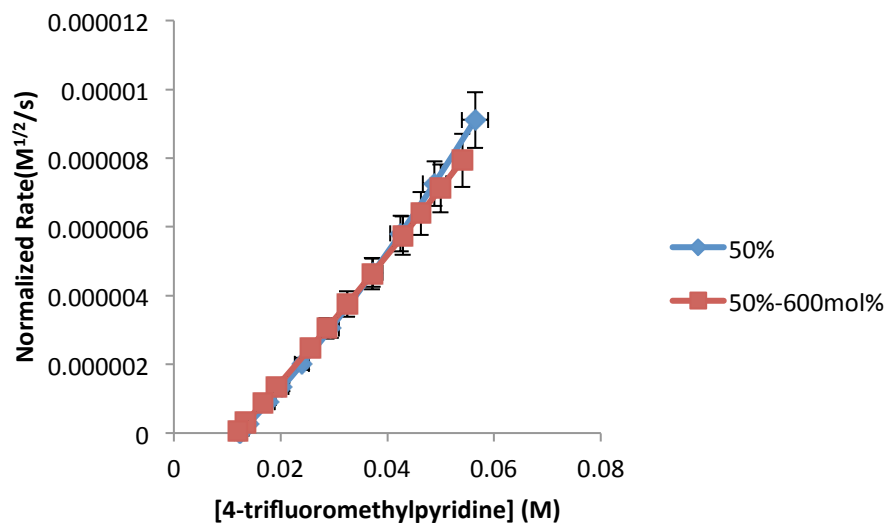

### Conditions for different excess experiments for rate order for 1

| Run       | [1] (M) | [2] (M) | K <sub>2</sub> S <sub>2</sub> O <sub>8</sub> (M) | AgNO <sub>3</sub> (M) |
|-----------|---------|---------|--------------------------------------------------|-----------------------|
| 1-100%    | 0.1     | 0.15    | 0.3                                              | 0.02                  |
| 4-Diff xs | 0.2     | 0.15    | 0.3                                              | 0.02                  |

### Growth data for Run 4

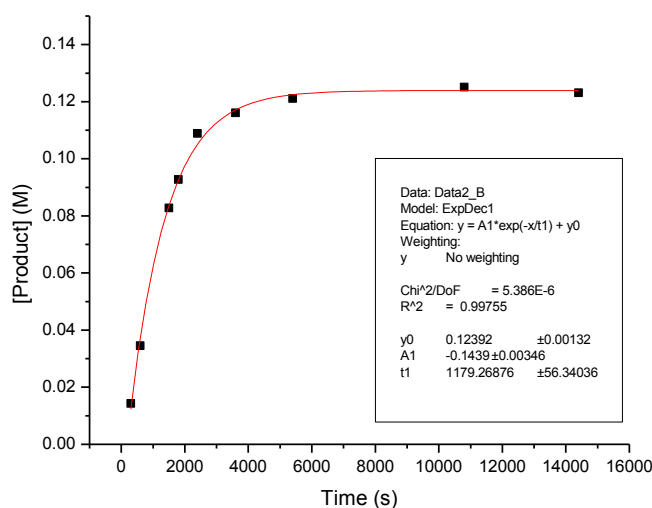

### Plot of rate vs. [3] for rate order of 1

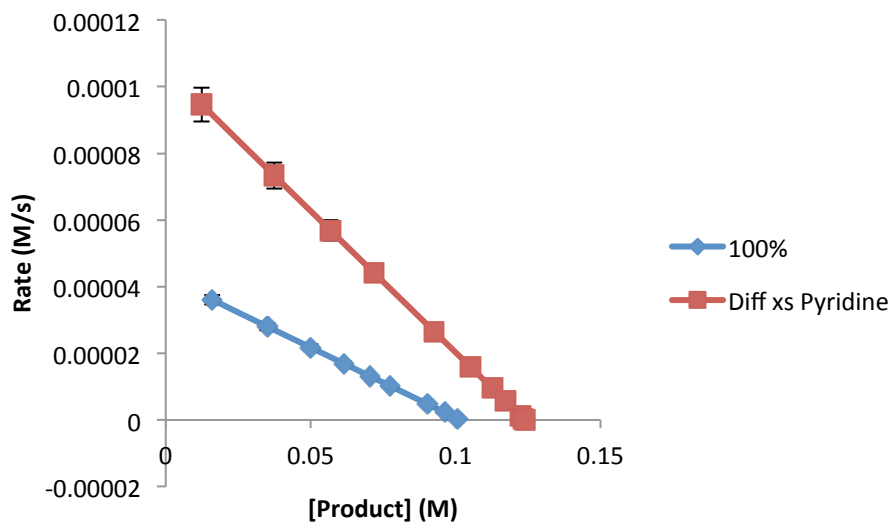

### Conditions for different excess experiments for rate order for AgNO<sub>3</sub>

| Run       | [1] (M) | [2] (M) | K <sub>2</sub> S <sub>2</sub> O <sub>8</sub> (M) | AgNO <sub>3</sub> (M) | [e] (M) |
|-----------|---------|---------|--------------------------------------------------|-----------------------|---------|
| 1-100%    | 0.1     | 0.15    | 0.3                                              | 0.02                  | 0.08    |
| 5-Diff xs | 0.1     | 0.15    | 0.3                                              | 0.04                  | 0.06    |

### Decay data for Run 5

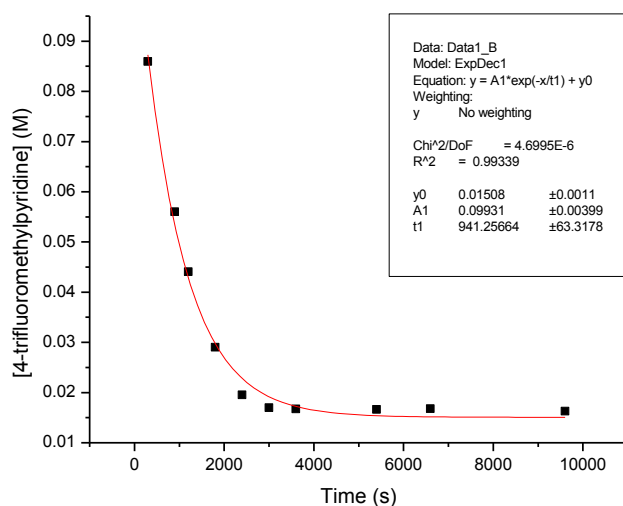

### Plot of rate vs. [1] for rate order for AgNO<sub>3</sub>

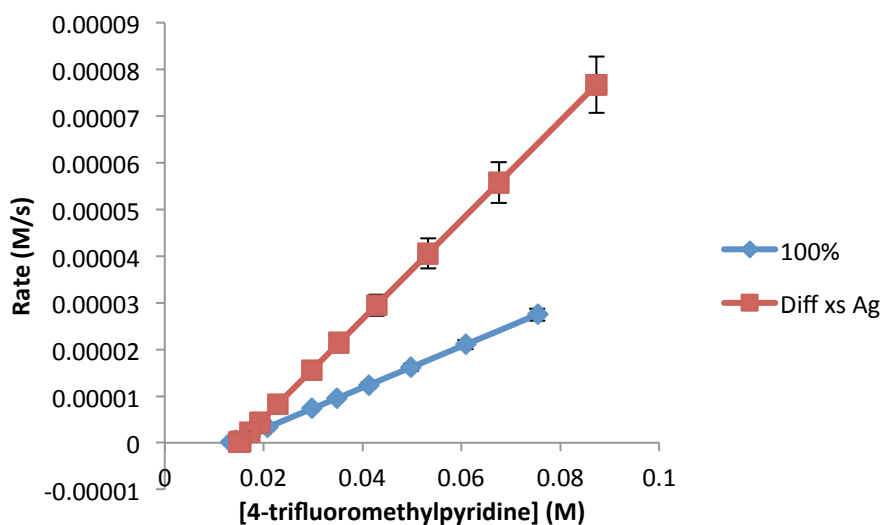

### Plot of normalized rate vs. [1] for rate order of $\text{AgNO}_3$

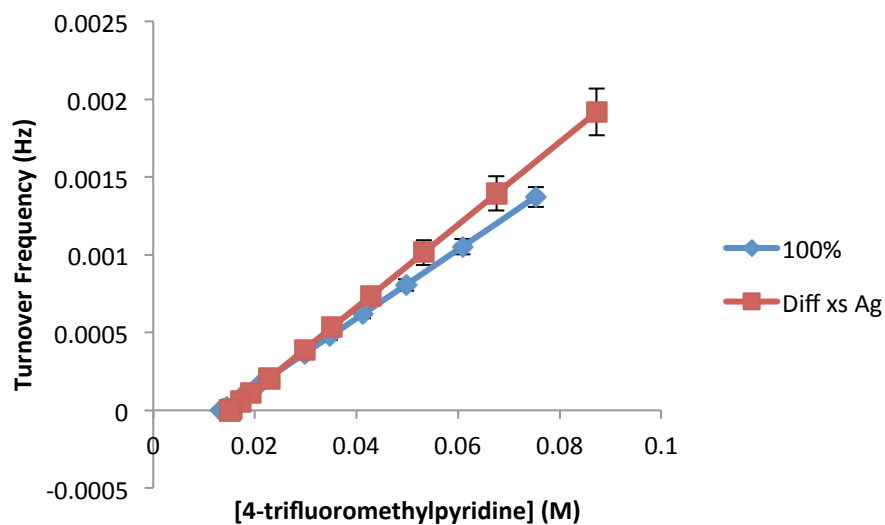

### Conditions for different excess experiments for rate order for $\text{K}_2\text{S}_2\text{O}_8$

| Run       | [1] (M) | [2] (M) | $\text{K}_2\text{S}_2\text{O}_8$ (M) | [e] (M) | $\text{AgNO}_3$ (M) |
|-----------|---------|---------|--------------------------------------|---------|---------------------|
| 1-100%    | 0.1     | 0.15    | 0.3                                  | 0.2     | 0.02                |
| 6-Diff xs | 0.1     | 0.15    | 0.6                                  | 0.5     | 0.02                |

### Decay data for Run 6

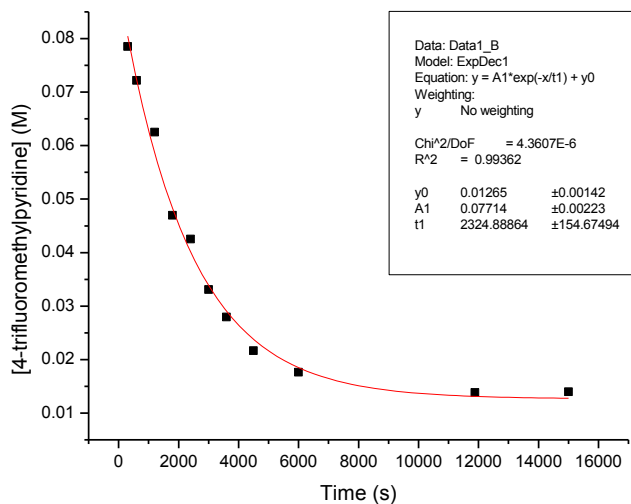

### Plot of rate vs. [1] for rate order for $K_2S_2O_8$

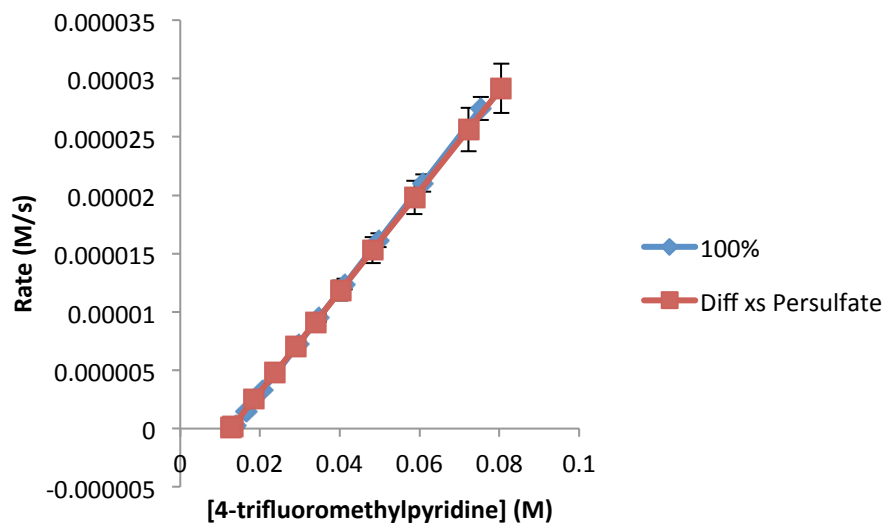

### Conditions for different excess experiments for rate order for TFA

| Run       | [1] (M) | [2] (M) | $K_2S_2O_8$ (M) | $AgNO_3$ (M) | TFA (M) |
|-----------|---------|---------|-----------------|--------------|---------|
| 1-100%    | 0.1     | 0.15    | 0.3             | 0.02         | 0.1     |
| 7-Diff xs | 0.1     | 0.15    | 0.3             | 0.02         | 0.2     |

### Decay data for Run 7

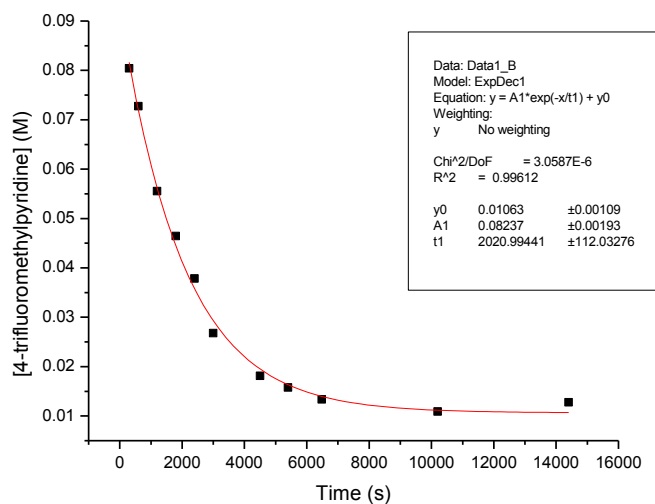

### Plot of rate vs. [1] for rate order for TFA

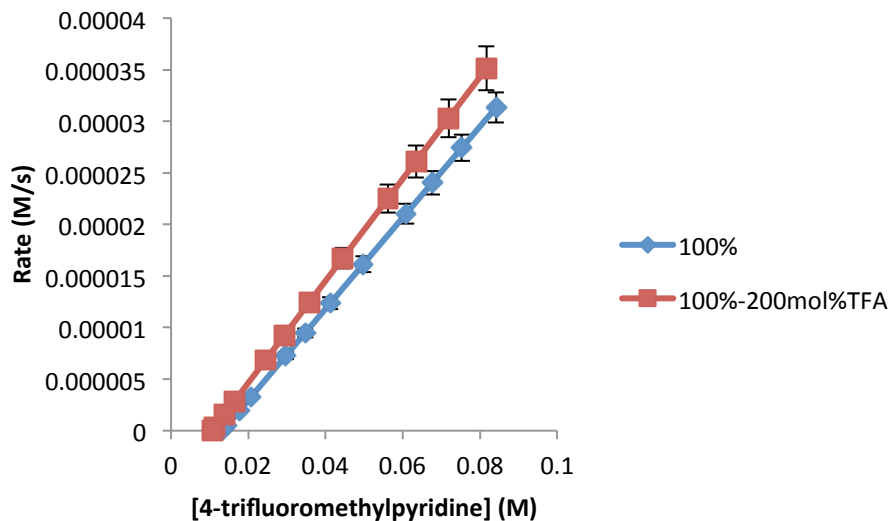

### Conditions for different excess experiments for rate order for Na<sub>2</sub>S<sub>2</sub>O<sub>8</sub>

| Run       | [1] (M) | [2] (M) | Na <sub>2</sub> S <sub>2</sub> O <sub>8</sub> (M) | [e] (M) | AgNO <sub>3</sub> (M) |
|-----------|---------|---------|---------------------------------------------------|---------|-----------------------|
| 8-100%    | 0.1     | 0.15    | 0.3                                               | 0.2     | 0.02                  |
| 9-Diff xs | 0.1     | 0.15    | 0.6                                               | 0.5     | 0.02                  |

### Decay data for Run 8

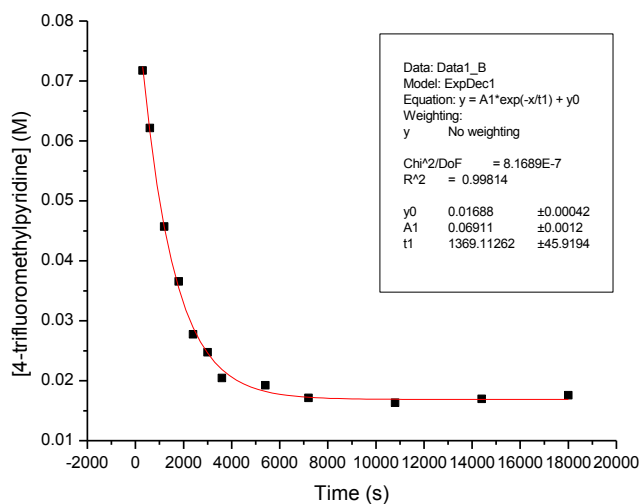

### Decay data for Run 9

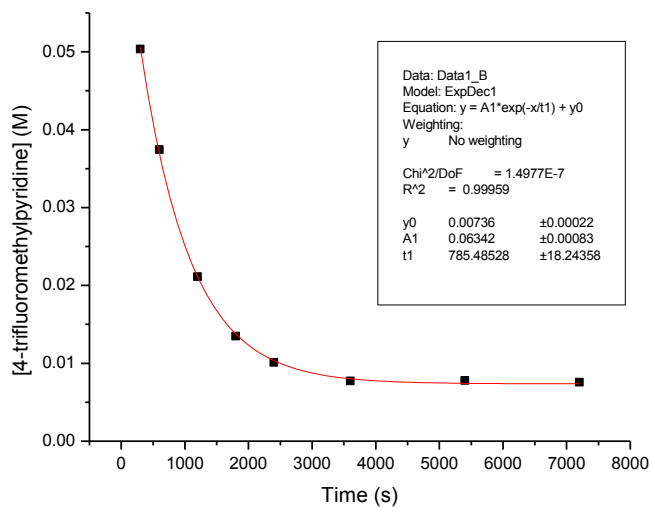

### Plot of rate vs. [1] for rate order for Na<sub>2</sub>S<sub>2</sub>O<sub>8</sub>

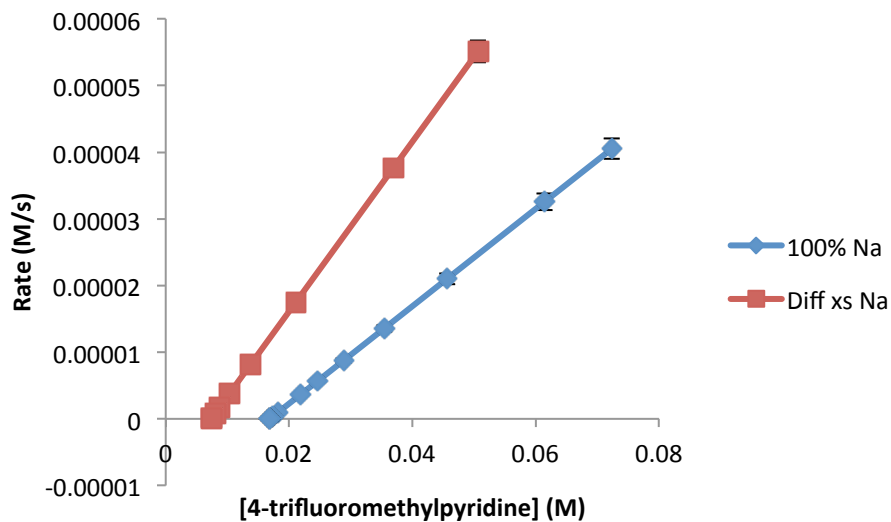

### Conditions for experiments using allyl acetate as sulfate radical anion trap

| Run        | [1] (M) | [2] (M) | Na <sub>2</sub> S <sub>2</sub> O <sub>8</sub> (M) | AgNO <sub>3</sub> (M) | Allyl Acetate (M) |
|------------|---------|---------|---------------------------------------------------|-----------------------|-------------------|
| 1-100%     | 0.1     | 0.15    | 0.3                                               | 0.02                  | 0.0               |
| 10-AllylAc | 0.1     | 0.15    | 0.3                                               | 0.02                  | 0.6               |

### Decay plot for Run 10

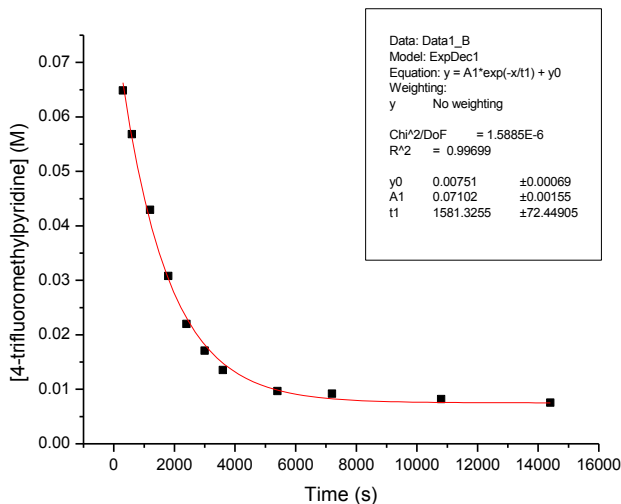

### Plot of rate vs. [1] comparing Run 1 (100% run) to Run 10 (100% run with Allyl Acetate)

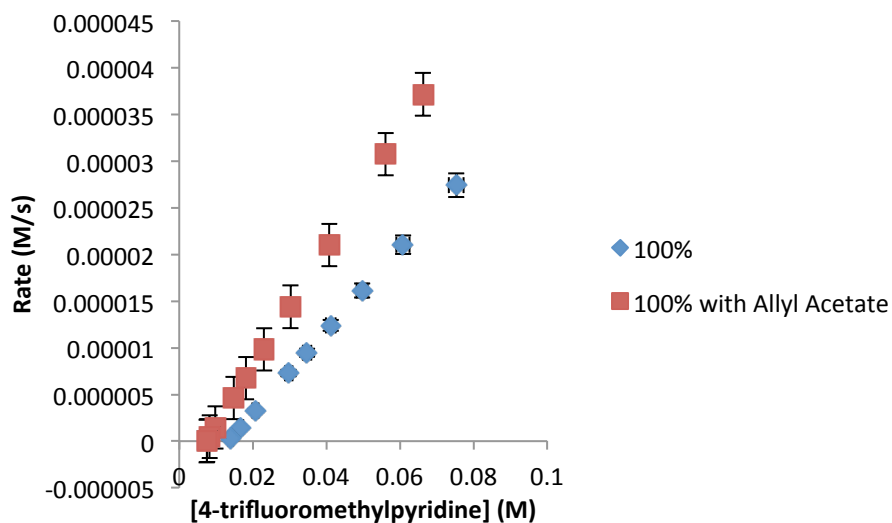



## Calculation of conversion of rate data and error

Concentration samples at specific time points are plotted as [1] (M) vs. time (s). The data are then fit to a first order exponential decay using Equation 1.

$$[1] = y_0 + Ae^{-\frac{time}{t}} \quad (1)$$

The standard deviation of the [1] resulting from curve fitting is determined using Equation 2.

$$\sigma_{[1]} = Ae^{-\frac{time}{t}} \sqrt{\left(\frac{-e^{-\frac{time}{t}}}{t}\right)^2 + \left(\frac{\sigma_A}{A}\right)^2} + \sigma_{y_0} \quad (2)$$

The derivative of Equation 1 provides the equation for the rate of change in [1] and is given in Equation 3.

$$-\frac{d[1]}{dt} = \frac{Ae^{-\frac{time}{t}}}{-t} \quad (3)$$

The standard deviation of  $-d[1]/dt$  resulting from Equation 3 is determined using Equation 4.

$$\sigma_{\frac{d[1]}{dt}} = \frac{Ae^{-\frac{time}{t}}}{-t} \sqrt{\left(\frac{-e^{-\frac{time}{t}}}{t} \frac{time}{\sigma_t}\right)^2 + \left(\frac{\sigma_A}{A}\right)^2 + \left(\frac{\sigma_t}{t}\right)^2} \quad (4)$$

## Reactions of boronic acid with silver nitrate

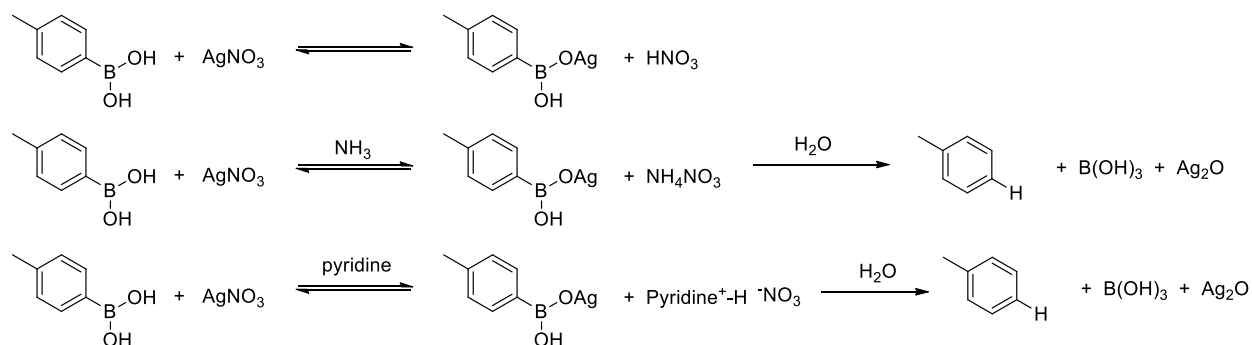

## Derivation of rate law

Rate Equation:

$$-\frac{d[CF_3C_5H_4N]}{dt} = k_2[CF_3C_5H_4N - Ag^I][S_2O_8]$$

The interaction between silver(I) and pyridine was assumed to be at steady state:

$$[CF_3C_5H_4N - Ag^I] = \frac{k_1[CF_3C_5H_4N][Ag^I]}{k_{-1} + k_2[S_2O_8^{2-}] + k_3[Ar-B(OH)_2]}$$

$$-\frac{d[CF_3C_5H_4N]}{dt} = \frac{k_1 k_2 [CF_3C_5H_4N][Ag^I][S_2O_8]}{k_{-1} + k_2[S_2O_8^{2-}] + k_3[Ar-B(OH)_2]}$$

A mass balance was written for the silver complexes in the system:

$$[Ag^I]_{tot} = [Ag^I] + [CF_3C_5H_4N - Ag^I]$$

$[Ag^I]$  was solved for and inserted into the rate law:

$$-\frac{d[CF_3C_5H_4N]}{dt} = \left( \frac{k_1 k_2 [CF_3C_5H_4N][S_2O_8]}{k_{-1} + k_2[S_2O_8^{2-}] + k_3[Ar-B(OH)_2]} \right) \left( \frac{k_{-1}[Ag^I]_{tot} + k_2[S_2O_8^{2-}][Ag^I]_{tot} + k_3[Ar-B(OH)_2][Ag^I]_{tot}}{k_{-1} + k_2[S_2O_8^{2-}] + k_3[Ar-B(OH)_2] + k_1[CF_3C_5H_4N]} \right)$$

Assuming  $k_2 \ll k_{-1}$ ,  $k_2 \ll k_3$ ,  $k_2 \ll k_1$ , and that  $Ag^I$  is the resting state of the catalyst:

$$-\frac{d[CF_3C_5H_4N]}{dt} = k_1 k_2 [CF_3C_5H_4N][S_2O_8^{2-}][Ag^I]_{tot} \left( \frac{k_{-1} + k_2[S_2O_8^{2-}] + k_3[Ar-B(OH)_2]}{k_{-1}^2 + 2k_{-1}k_3[Ar-B(OH)_2] + k_3^2[Ar-B(OH)_2]^2} \right)$$

$$\approx k_{obs} \frac{[CF_3C_5H_4N][S_2O_8^{2-}][Ag^I]_{tot}}{[Ar-B(OH)_2]^{0.5}}$$

# Spectral data for pyridine $^1\text{H}$ NMR studies

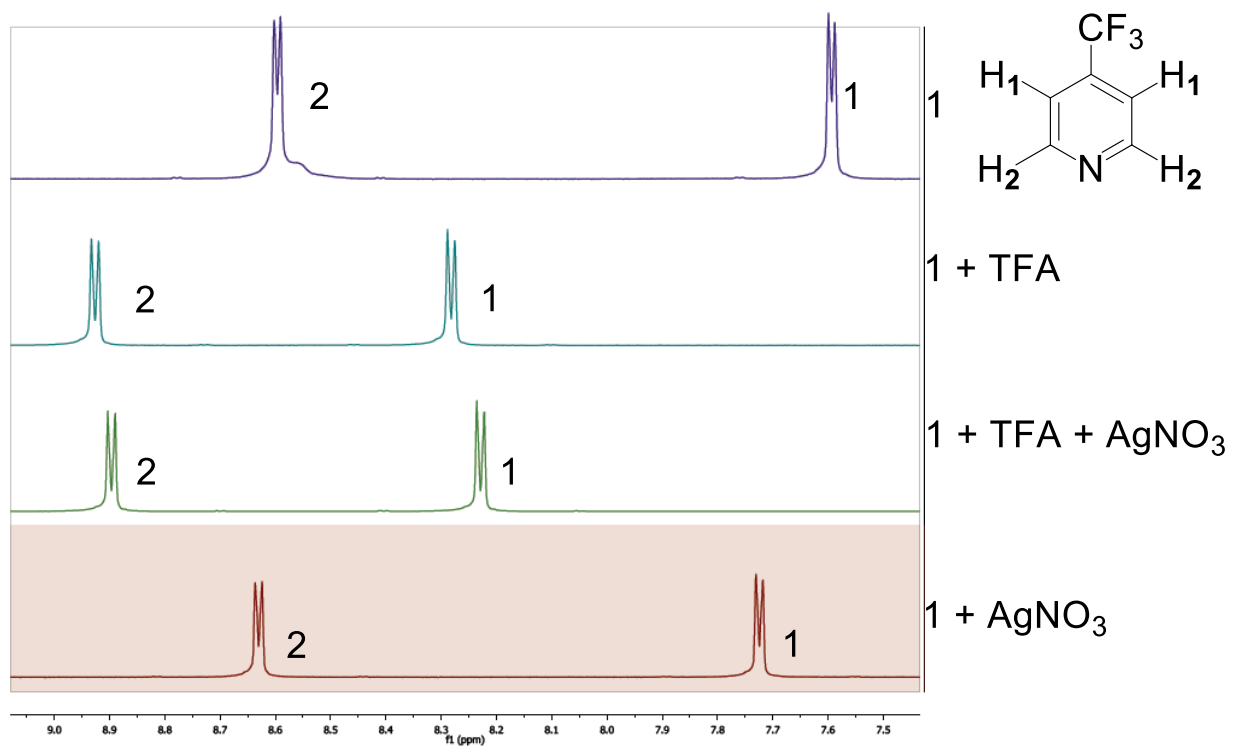

<sup>11</sup>B NMR spectrum of 2

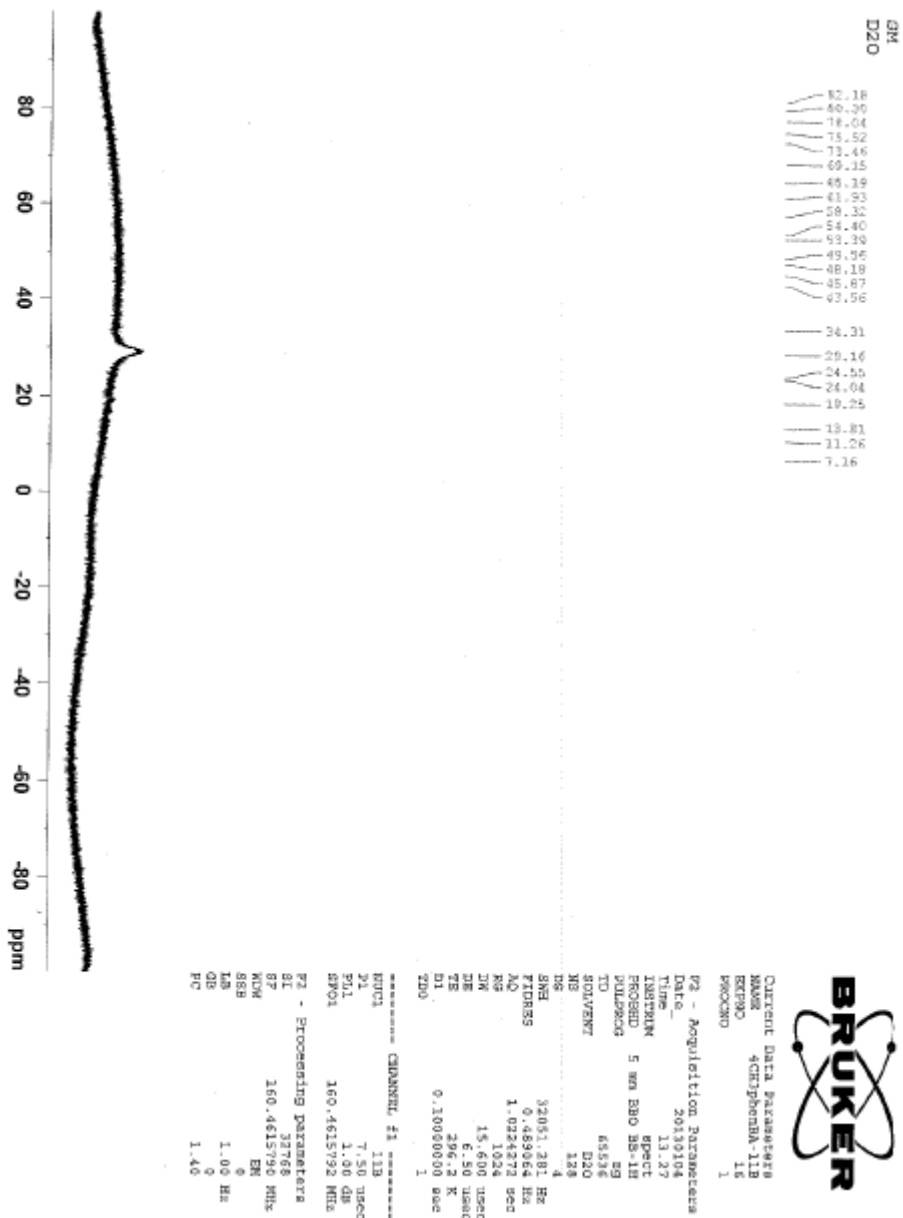

$^{11}\text{B}$  NMR spectrum of **4** under reaction conditions at  $t = 0$  mins

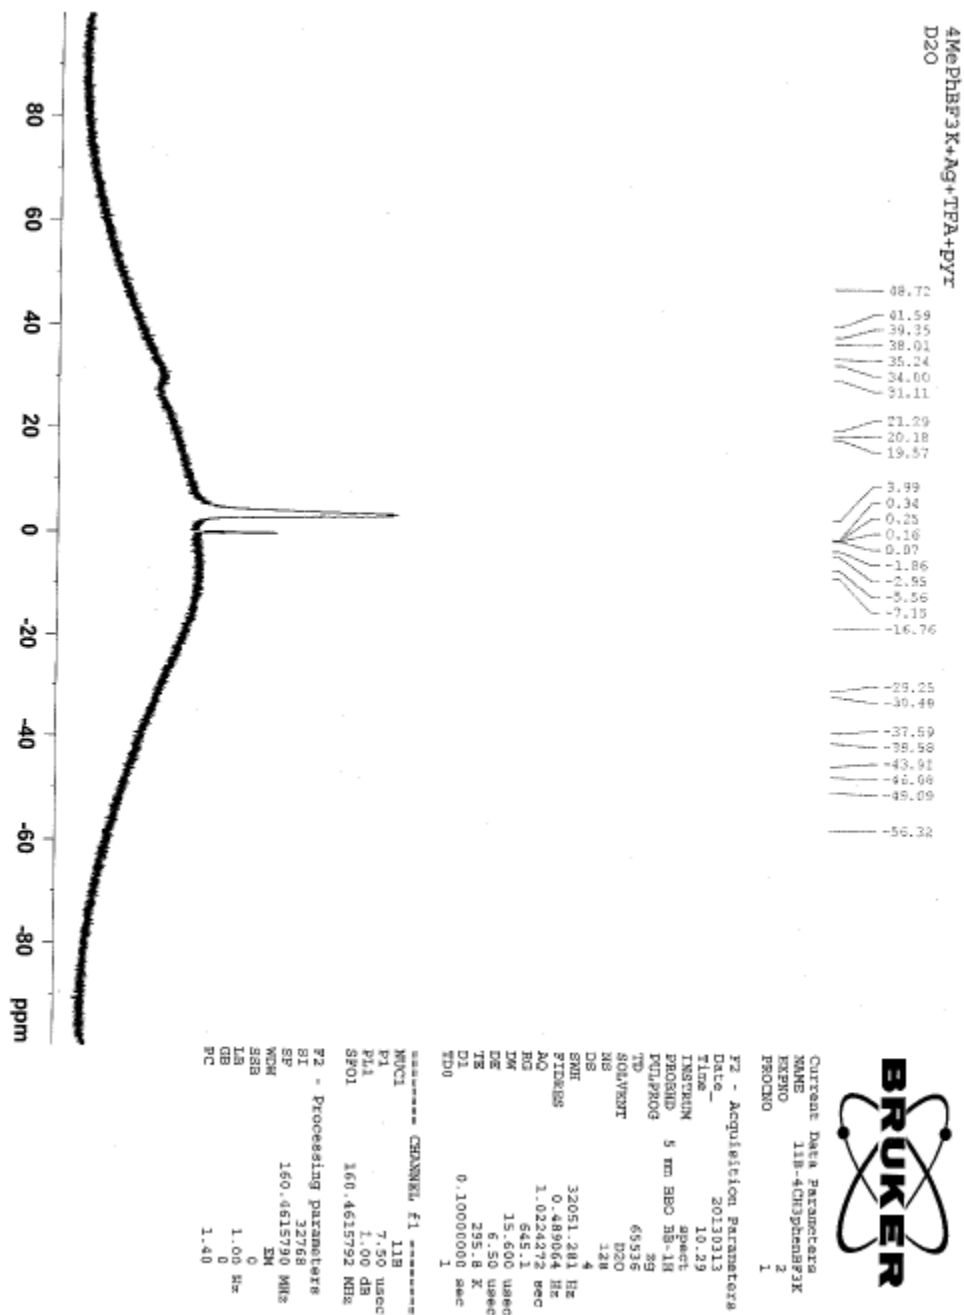

<sup>11</sup>B NMR spectrum of **4** under reaction conditions at t = 4h

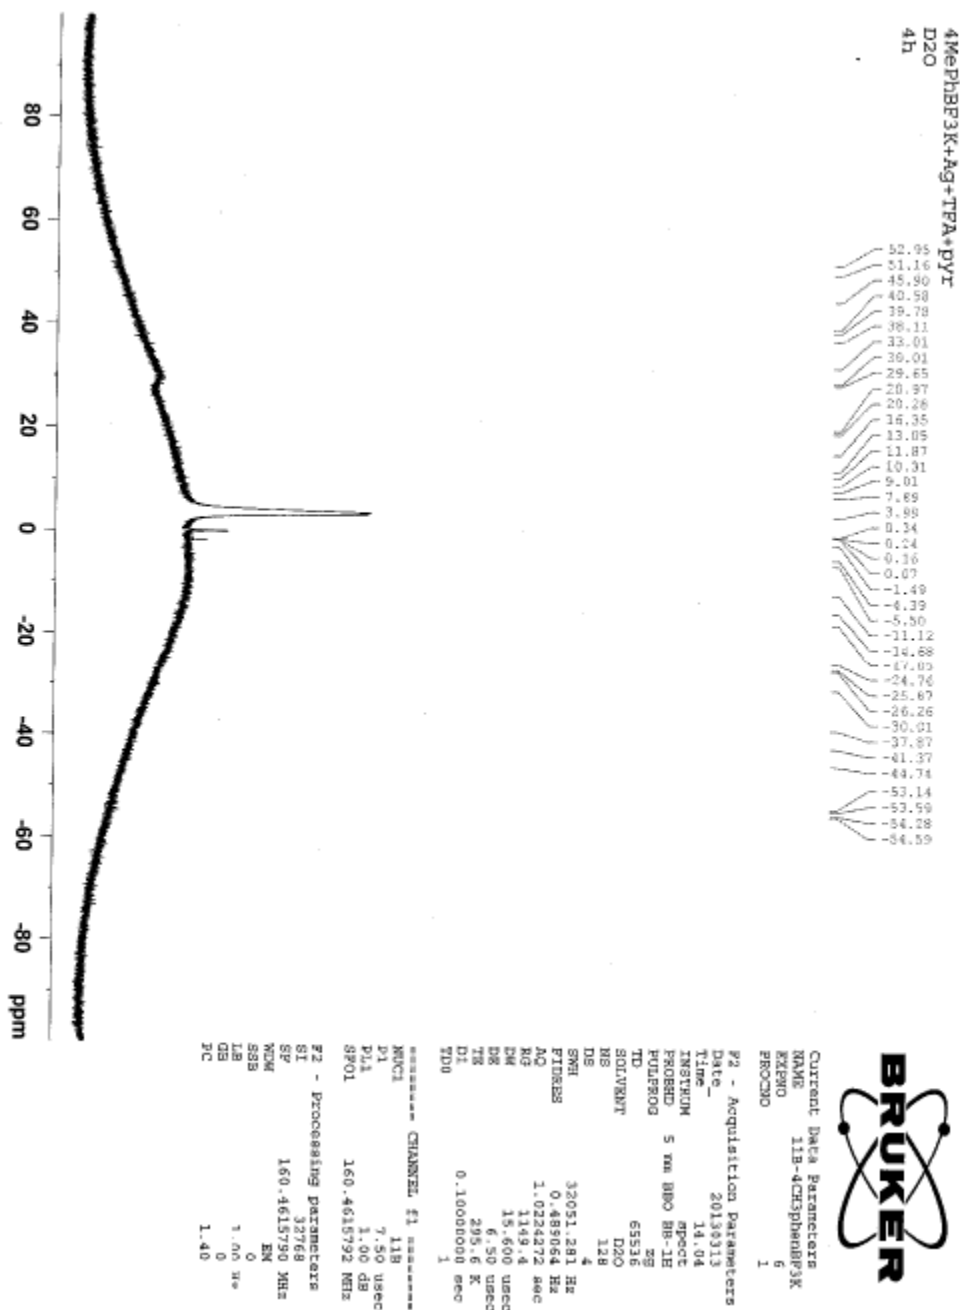

<sup>1</sup>H and <sup>13</sup>C NMR spectra for cross-coupled product 3

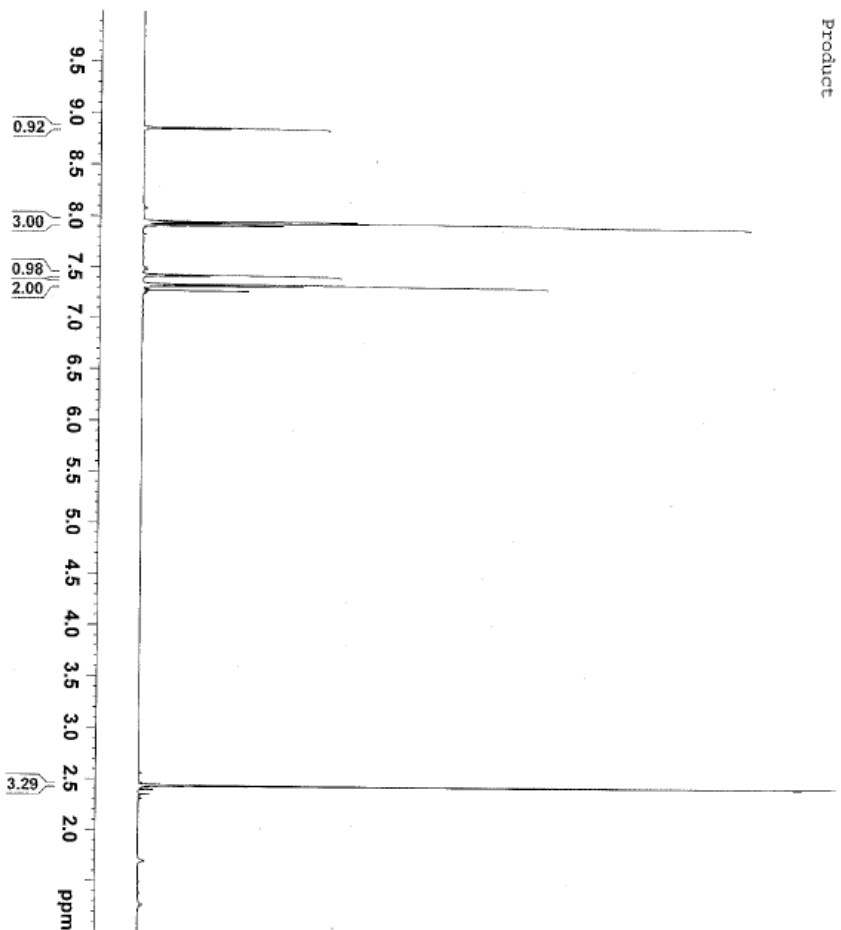

Product

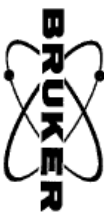

```

Current Data Parameters
NAME      4C13JY7-CH13PM1-090412
EXPNO    1
PROCNO   1

F2 - Acquisition Parameters
Date_    20101114
Time     14:02
INSTRUM  spect
PROBHD   5 mm TXI 1H/1
PULPROG  zgpg30
TD        32768
SOLVENT  CDCl3
NS        4
DS        0
SWH       6612.757 Hz
FIDRES    0.20167 Hz
AQ         2.472865 sec
RG         114
DM         75.500 usec
DE         254.100 usec
TE         294.2 K
D1         1.00000000 sec
TD0        1

===== CHANNEL f1 =====
NUC1      13C
P1         7.69 usec
PL1       1.00 dB
SFO1      500.1360119 MHz

F2 - Processing parameters
SI         65536
SF         500.1360880 MHz
WDW         EM
SSB         0
LB         0.10 Hz
GB         0
PC         1.00
    
```

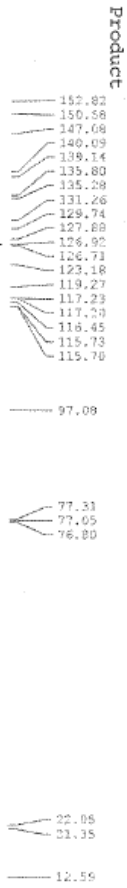

152.82  
 150.58  
 147.08  
 146.09  
 139.14  
 135.80  
 135.28  
 131.26  
 129.74  
 127.89  
 126.92  
 126.71  
 123.18  
 119.27  
 117.23  
 117.20  
 116.45  
 115.73  
 115.70  
 97.08  
 77.31  
 77.05  
 76.80  
 66.35  
 62.35  
 20.56

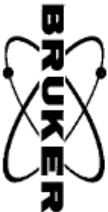

Current Data Parameters  
 NAME: 13C\_E02172-44191818-Product  
 RUNNO: 1  
 PROCNO: 1  
 F2 - Acquisition Parameters  
 Date\_ 20100905  
 Time\_ 14.07  
 F2OPC: 1  
 PROGRAM: 5 IN F2 13C  
 PULPROG: zgpg30  
 2D: 0  
 3D: 0  
 4D: 0  
 5D: 0  
 6D: 0  
 7D: 0  
 8D: 0  
 9D: 0  
 10D: 0  
 11D: 0  
 12D: 0  
 13D: 0  
 14D: 0  
 15D: 0  
 16D: 0  
 17D: 0  
 18D: 0  
 19D: 0  
 20D: 0  
 21D: 0  
 22D: 0  
 23D: 0  
 24D: 0  
 25D: 0  
 26D: 0  
 27D: 0  
 28D: 0  
 29D: 0  
 30D: 0  
 31D: 0  
 32D: 0  
 33D: 0  
 34D: 0  
 35D: 0  
 36D: 0  
 37D: 0  
 38D: 0  
 39D: 0  
 40D: 0  
 41D: 0  
 42D: 0  
 43D: 0  
 44D: 0  
 45D: 0  
 46D: 0  
 47D: 0  
 48D: 0  
 49D: 0  
 50D: 0  
 51D: 0  
 52D: 0  
 53D: 0  
 54D: 0  
 55D: 0  
 56D: 0  
 57D: 0  
 58D: 0  
 59D: 0  
 60D: 0  
 61D: 0  
 62D: 0  
 63D: 0  
 64D: 0  
 65D: 0  
 66D: 0  
 67D: 0  
 68D: 0  
 69D: 0  
 70D: 0  
 71D: 0  
 72D: 0  
 73D: 0  
 74D: 0  
 75D: 0  
 76D: 0  
 77D: 0  
 78D: 0  
 79D: 0  
 80D: 0  
 81D: 0  
 82D: 0  
 83D: 0  
 84D: 0  
 85D: 0  
 86D: 0  
 87D: 0  
 88D: 0  
 89D: 0  
 90D: 0  
 91D: 0  
 92D: 0  
 93D: 0  
 94D: 0  
 95D: 0  
 96D: 0  
 97D: 0  
 98D: 0  
 99D: 0  
 100D: 0  
 F2P1RES: 0  
 AQ: 0.480000 sec  
 RG: 1.000000 sec  
 IN: 1.000000 sec  
 DE: 1.000000 sec  
 15: 7.00 usec  
 16: 7.00 usec  
 17: 298.2 K  
 18: 1.000000 sec  
 19: 0.000000 sec  
 20: 0.000000 sec  
 21: 0.000000 sec  
 22: 0.000000 sec  
 23: 0.000000 sec  
 24: 0.000000 sec  
 25: 0.000000 sec  
 26: 0.000000 sec  
 27: 0.000000 sec  
 28: 0.000000 sec  
 29: 0.000000 sec  
 30: 0.000000 sec  
 31: 0.000000 sec  
 32: 0.000000 sec  
 33: 0.000000 sec  
 34: 0.000000 sec  
 35: 0.000000 sec  
 36: 0.000000 sec  
 37: 0.000000 sec  
 38: 0.000000 sec  
 39: 0.000000 sec  
 40: 0.000000 sec  
 41: 0.000000 sec  
 42: 0.000000 sec  
 43: 0.000000 sec  
 44: 0.000000 sec  
 45: 0.000000 sec  
 46: 0.000000 sec  
 47: 0.000000 sec  
 48: 0.000000 sec  
 49: 0.000000 sec  
 50: 0.000000 sec  
 51: 0.000000 sec  
 52: 0.000000 sec  
 53: 0.000000 sec  
 54: 0.000000 sec  
 55: 0.000000 sec  
 56: 0.000000 sec  
 57: 0.000000 sec  
 58: 0.000000 sec  
 59: 0.000000 sec  
 60: 0.000000 sec  
 61: 0.000000 sec  
 62: 0.000000 sec  
 63: 0.000000 sec  
 64: 0.000000 sec  
 65: 0.000000 sec  
 66: 0.000000 sec  
 67: 0.000000 sec  
 68: 0.000000 sec  
 69: 0.000000 sec  
 70: 0.000000 sec  
 71: 0.000000 sec  
 72: 0.000000 sec  
 73: 0.000000 sec  
 74: 0.000000 sec  
 75: 0.000000 sec  
 76: 0.000000 sec  
 77: 0.000000 sec  
 78: 0.000000 sec  
 79: 0.000000 sec  
 80: 0.000000 sec  
 81: 0.000000 sec  
 82: 0.000000 sec  
 83: 0.000000 sec  
 84: 0.000000 sec  
 85: 0.000000 sec  
 86: 0.000000 sec  
 87: 0.000000 sec  
 88: 0.000000 sec  
 89: 0.000000 sec  
 90: 0.000000 sec  
 91: 0.000000 sec  
 92: 0.000000 sec  
 93: 0.000000 sec  
 94: 0.000000 sec  
 95: 0.000000 sec  
 96: 0.000000 sec  
 97: 0.000000 sec  
 98: 0.000000 sec  
 99: 0.000000 sec  
 100: 0.000000 sec  
 ===== CHANNEL f1 =====  
 NUC1: 13C  
 P1: 14.00 usec  
 PL1: 0.00 dB  
 FREQ1: 125.7615440 MHz  
 SFO1: 125.7615440 MHz  
 ===== CHANNEL f2 =====  
 CDETRM2: walters  
 NUC2: 1H  
 P2: 9.00 usec  
 PL2: 0.00 dB  
 FREQ2: 500.1371250 MHz  
 SFO2: 500.1371250 MHz  
 F2 - Processing parameters  
 SI: 32768  
 SF: 125.7615440 MHz  
 WDM: 0 Hz  
 SSB: 0 Hz  
 GB: 1.00 Hz  
 PC: 1.40

160 150 140 130 120 110 100 90 80 70 60 50 40 30 20 ppm
